# Supplementary material for: Hair Growth Promotion and Anti-Hair Loss Effects of By-Products Arabica Coffee Pulp Extracts Using Supercritical Fluid Extraction
Source: MDPI journal article supplement (doi:10.3390/foods12224116), 2023-11-13
Supplement: s1 [file s1]

**Table S1:** Microscopical images represent HFDPCs migration areas at 0 and 48 h after exposure to all coffee extracts in comparison to the standards.

|               | 0 |                                                                                     | 48 |                                                                                      |
|---------------|---|-------------------------------------------------------------------------------------|----|--------------------------------------------------------------------------------------|
| Control       |   |    |    |    |
| Caffeine      |   |    |    |    |
| Minoxidil     |   |   |    |   |
| Purmorphamine |   |  |    |  |
| SFE-1         |   |  |    |  |
| SFE-2         |   |  |    |  |
| SFE-3         |   |  |    |  |

**Table 1 Continued:** Microscopical images represent HFDPCs migration areas at 0 and 48 h after exposure to all coffee extracts in comparison to the standards.

|       |  |                                                                                   |  |  |                                                                                    |  |
|-------|--|-----------------------------------------------------------------------------------|--|--|------------------------------------------------------------------------------------|--|
| SFE-4 |  | 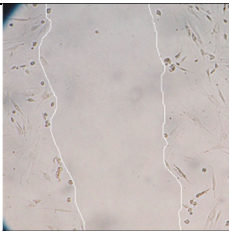 |  |  |  |  |
| SFE-5 |  |  |  |  |  |  |
| SFE-6 |  |  |  |  |  |  |
